# Supplementary material for: Markdown Time for Perishables Based on Dynamic Quality Evaluation for Complex Data Analysis
Source: Hindawi journal article supplement (doi:10.1155/2021/6695626), 2021-01-01
Supplement: f1 [file 6695626.f1.zip › Supplementary Data.docx]

**Appendix**

**Proof of Theorem 2:** From Lemma 1, we can obtain the optimal inventory as and then substitute it into the profit function as . Then derive on as . So, merchant would try to delay the markdown time: (1) If , then , merchant will not implement markdown price until the expiration data, i.e., *T*; (2) If , then and ; (3) If *,* then *.* Certainly, this scenarios will no longer occurs*.* Hence, merchant would delay the markdown time to the expiration rate or time that the demand rate decrease to zero, i.e., or . The inventory as .

**Proof of Lemma 2**: Deprive the second derivative functions of on the initial inventory as and . Then is a concave function on , and then can obtain the optimal inventory satisfy the following equations as .

**Proof of Lemma 3**: Note that and then , we have: (1); (2) . Then, we have *.* Compare the 0 with the left and right endpoints to obtain the Lemma 3.
