# Supplementary material for: Markdown Time for Perishables Based on Dynamic Quality Evaluation for Complex Data Analysis
Source: Hindawi journal article supplement (doi:10.1155/2021/6695626), 2021-01-01
Supplement: f1 [file 6695626.f1.zip › Supplementary_ Description.docx]

The supplementary file includes some proofs supporting the manuscript.
